# Supplementary material for: Environmentally Friendly Approach for Nd2Fe14B Magnetic Phase Extraction by Selective Chemical Leaching: A Proof-of-Concept Study
Source: MDPI journal article supplement (doi:10.3390/ma16145181), 2023-07-23
Supplement: s1 [file s1]

**Table S1.** ICP-MS instrumental parameters used to determine element concentrations in magnet samples.

| <i>Parameter</i>                   | <i>Type/Value</i>                                                                                                                                                  |
|------------------------------------|--------------------------------------------------------------------------------------------------------------------------------------------------------------------|
| <i>Plasma condition</i>            |                                                                                                                                                                    |
| Forward power                      | 1550 W                                                                                                                                                             |
| Plasma gas flow                    | 15.0 L min <sup>-1</sup>                                                                                                                                           |
| Carrier gas flow                   | 1.05 L min <sup>-1</sup>                                                                                                                                           |
| Sample depth                       | 8 mm                                                                                                                                                               |
| <i>Cell parameters</i>             |                                                                                                                                                                    |
| He gas flow                        | 4.3 mL min <sup>-1</sup>                                                                                                                                           |
| Octopole bias                      | -18.0 V                                                                                                                                                            |
| Octopole RF                        | 200 V                                                                                                                                                              |
| Energy discrimination              | 5.0 V                                                                                                                                                              |
| <i>Data acquisition parameters</i> |                                                                                                                                                                    |
| Isotopes monitored                 | <sup>11</sup> B, <sup>27</sup> Al, <sup>56</sup> Fe, <sup>59</sup> Co, <sup>63</sup> Cu, <sup>69</sup> Ga, <sup>141</sup> Pr, <sup>146</sup> Nd, <sup>163</sup> Dy |
| Isotopes of internal standards     | <sup>103</sup> Rh, <sup>193</sup> Ir                                                                                                                               |
| Integration time per isotope       | 0.1 s                                                                                                                                                              |

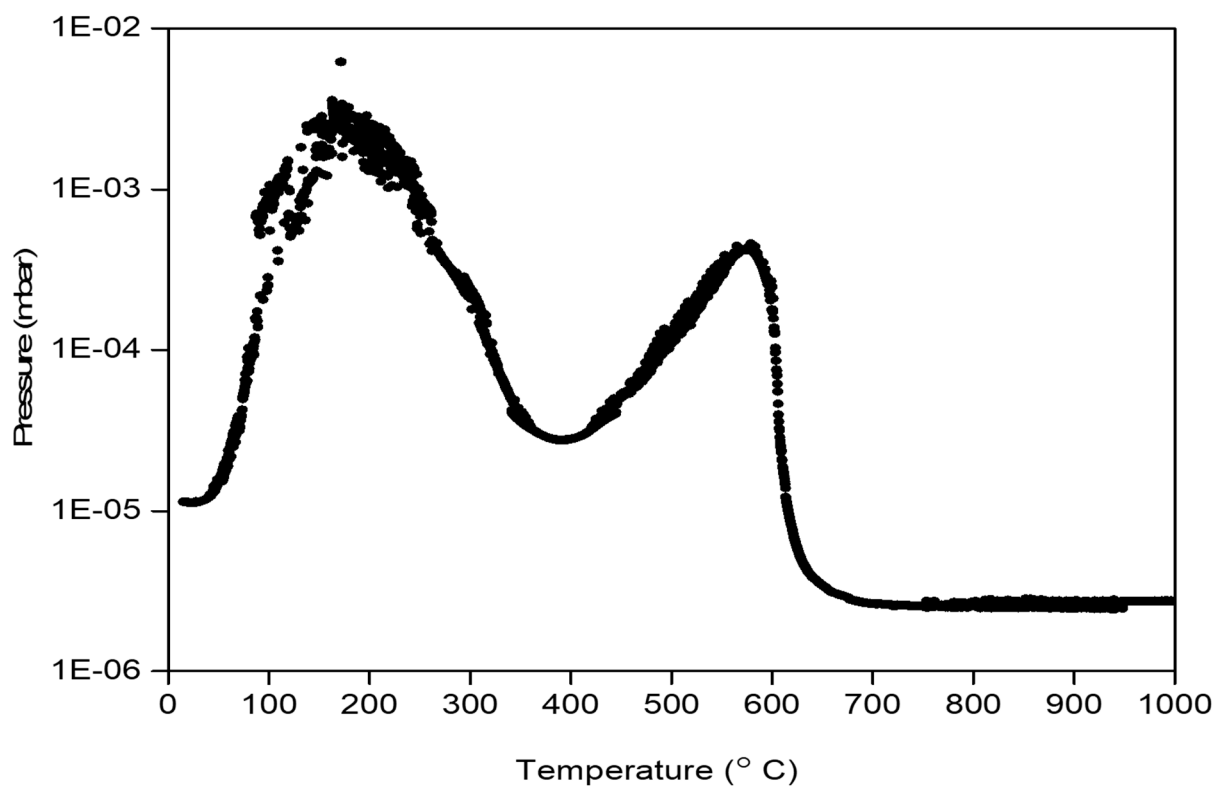

**Figure S1.** Evolution of pressure with temperature up to 1000 °C for JM-NDG powder.
